# Supplementary material for: Prebiotic effect of inulin-type fructans on faecal microbiota and short-chain fatty acids in type 2 diabetes: a randomised controlled trial
Source: PubMed Central journal article supplement (PMC7501097; doi:10.1007/s00394-020-02282-5), 2020-05-21
Supplement: 394_2020_2282_MOESM3_ESM.pdf [file 394_2020_2282_MOESM3_ESM.pdf]

## Electronic Supplementary Material

Prebiotic effect of inulin-type fructans on fecal microbiota and short-chain fatty acids in type 2 diabetes: A randomized controlled trial

European Journal of Nutrition

Eline Birkeland<sup>1,2</sup>, Sedegheh Gharagozlian<sup>1</sup>, Kåre I. Birkeland<sup>2,3</sup>, Jørgen Valeur<sup>4,5</sup>, Ingrid Måge<sup>6</sup>, Ida Rud<sup>6</sup>, Anne-Marie Aas<sup>1,2</sup>

Ida Rud and Anne-Marie Aas share last authorship

<sup>1</sup>Section of Nutrition and Dietetics, Department of Clinical Service, Division of Medicine, Oslo University Hospital, Norway, <sup>2</sup>Institute of Clinical Medicine, University of Oslo, Norway <sup>3</sup>Department of Transplantation Medicine, Oslo University Hospital, Norway, <sup>4</sup>Department of Gastroenterology, Oslo University Hospital, Oslo, Norway, <sup>5</sup>Unger-Vetlesen Institute, Lovisenberg Diaconal Hospital, Oslo, Norway, <sup>6</sup>Nofima - Norwegian Institute of Food, Fisheries and Aquaculture Research, Ås, Norway.

Corresponding author: Eline Birkeland, eline.birkeland@ous-hf.no

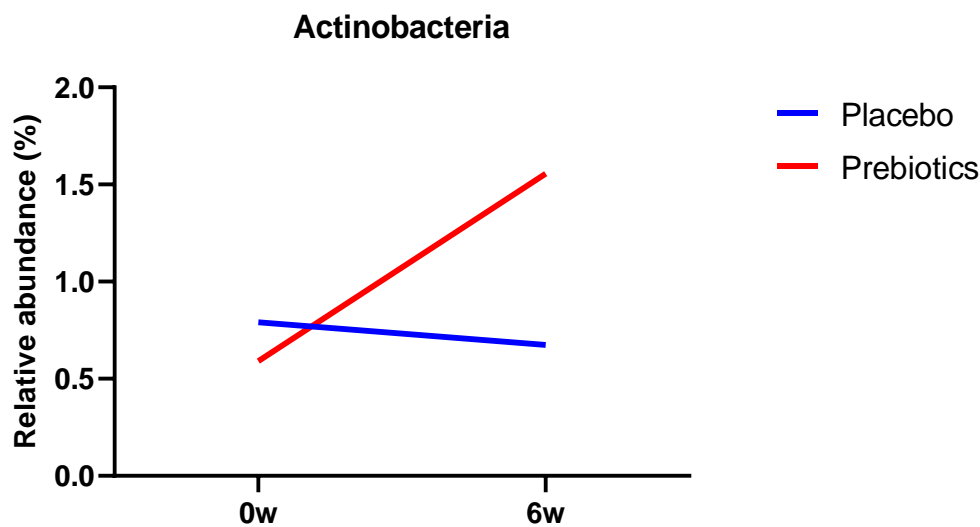

**Online Resource 3.** Interaction plot of the prebiotic effect on Actinobacteria (VIP 1.32)
