# Supplementary material for: Prebiotic effect of inulin-type fructans on faecal microbiota and short-chain fatty acids in type 2 diabetes: a randomised controlled trial
Source: Springer Nature journal article supplement (doi:10.1007/s00394-020-02282-5), 2020-05-21
Supplement: MOESM2 [file 18002980]

## Electronic Supplementary Material

Prebiotic effect of inulin-type fructans on fecal microbiota and short-chain fatty acids in type 2 diabetes: A randomized controlled trial

European Journal of Nutrition

Eline Birkeland<sup>1,2</sup>, Sedegheh Gharagozlian<sup>1</sup>, Kåre I. Birkeland<sup>2,3</sup>, Jørgen Valeur<sup>4,5</sup>, Ingrid Måge<sup>6</sup>, Ida Rud<sup>6</sup>, Anne-Marie Aas<sup>1,2</sup>

Ida Rud and Anne-Marie Aas share last authorship

<sup>1</sup>Section of Nutrition and Dietetics, Department of Clinical Service, Division of Medicine, Oslo University Hospital, Norway, <sup>2</sup>Institute of Clinical Medicine, University of Oslo, Norway <sup>3</sup>Department of Transplantation Medicine, Oslo University Hospital, Norway, <sup>4</sup>Department of Gastroenterology, Oslo University Hospital, Oslo, Norway, <sup>5</sup>Unger-Vetlesen Institute, Lovisenberg Diaconal Hospital, Oslo, Norway, <sup>6</sup>Nofima - Norwegian Institute of Food, Fisheries and Aquaculture Research, Ås, Norway.

Corresponding author: Eline Birkeland, eline.birkeland@ous-hf.no

**Online Resource 2.** ANOVA table and post-hoc level comparisons of the intervention design at different taxonomic levels.

|                 | Multivariate Analysis of Variance (ASCA) |                         |       | Post-hoc comparisons between Treatment x Week levels (PLS-DA) |                        |
|-----------------|------------------------------------------|-------------------------|-------|---------------------------------------------------------------|------------------------|
|                 | Explained variance (%)                   |                         |       | Explained variance (%) (cross-validated)                      |                        |
| Taxonomic level | Between subjects effect                  | Treatment x Week effect | Error | Treatment vs baseline/placebo                                 | Baseline1 vs baseline2 |
| L2              | 64.9 (p < 0.001)                         | 2.2 (p = 0.091)         | 32.9  | 8.0                                                           | 0.0                    |
| L4              | 65.7 (p < 0.001)                         | 1.7 (p = 0.195)         | 32.5  | 0.0                                                           | 0.0                    |
| L5              | 73.9 (p < 0.001)                         | 1.1 (p = 0.457)         | 25.0  | 0.0                                                           | 0.0                    |
| L6              | 73.2 (p < 0.001)                         | 1.3 (p = 0.123)         | 25.5  | 6.0                                                           | 0.0                    |
| L7              | 69.9 (p < 0.001)                         | 1.5 (p = 0.049)         | 28.6  | 43.0                                                          | 0.0                    |
