# Supplementary material for: Prebiotic effect of inulin-type fructans on faecal microbiota and short-chain fatty acids in type 2 diabetes: a randomised controlled trial
Source: Springer Nature journal article supplement (doi:10.1007/s00394-020-02282-5), 2020-05-21
Supplement: MOESM4 [file 18002980]

## Electronic Supplementary Material

Prebiotic effect of inulin-type fructans on fecal microbiota and short-chain fatty acids in type 2 diabetes: A randomized controlled trial

European Journal of Nutrition

Eline Birkeland<sup>1,2</sup>, Sedegheh Gharagozlian<sup>1</sup>, Kåre I. Birkeland<sup>2,3</sup>, Jørgen Valeur<sup>4,5</sup>, Ingrid Måge<sup>6</sup>, Ida Rud<sup>6</sup>, Anne-Marie Aas<sup>1,2</sup>

Ida Rud and Anne-Marie Aas share last authorship

<sup>1</sup>Section of Nutrition and Dietetics, Department of Clinical Service, Division of Medicine, Oslo University Hospital, Norway, <sup>2</sup>Institute of Clinical Medicine, University of Oslo, Norway <sup>3</sup>Department of Transplantation Medicine, Oslo University Hospital, Norway, <sup>4</sup>Department of Gastroenterology, Oslo University Hospital, Oslo, Norway, <sup>5</sup>Unger-Vetlesen Institute, Lovisenberg Diaconal Hospital, Oslo, Norway, <sup>6</sup>Nofima - Norwegian Institute of Food, Fisheries and Aquaculture Research, Ås, Norway.

Corresponding author: Eline Birkeland, eline.birkeland@ous-hf.no

### Online Resource 4. Overview of prebiotic affected OTUs determined by PLS-DA and their correlations to SCFAs (%)

| Bacterial OTUs |                                                     | Average abundance (%) | PLS regression of prebiotic affected OTUs and SCFA (%) |                                      |                                             |                         |                |                         |                |                         |                |                         |      |
|----------------|-----------------------------------------------------|-----------------------|--------------------------------------------------------|--------------------------------------|---------------------------------------------|-------------------------|----------------|-------------------------|----------------|-------------------------|----------------|-------------------------|------|
|                |                                                     |                       | Prebiotic affected OTUs determined by PLS-DA           |                                      |                                             | Acetic acid             |                | Propionic acid          |                | Butyric acid            |                | Valeric acid            |      |
|                |                                                     |                       | VIP                                                    | Pearson correlation with interaction | Effect size (Prebiotics - placebo/baseline) | Explained variance: 11% |                | Explained variance: 27% |                | Explained variance: 18% |                | Explained variance: 31% |      |
| OTU            | Taxonomy                                            |                       |                                                        |                                      | Spearman's rho                              | VIP                     | Spearman's rho | VIP                     | Spearman's rho | VIP                     | Spearman's rho | VIP                     |      |
| 370225         | p_Actinobacteria; g_Bifidobacterium; s_adolescentis | 0.0140                | 3.05                                                   | 0.99                                 | 1.78                                        | 0.05                    | 0.43           | -0.02                   | 0.42           | -0.07                   | 0.60           | 0.05                    | 0.56 |
| 559527         | p_Actinobacteria; g_Bifidobacterium; s_adolescentis | 0.6200                | 3.19                                                   | 0.99                                 | 1.76                                        | 0.15                    | 0.92           | -0.04                   | 0.23           | -0.15                   | 1.28           | -0.04                   | 0.61 |
| 997439         | p_Actinobacteria; g_Bifidobacterium; s_adolescentis | 0.0089                | 2.64                                                   | 0.99                                 | 1.59                                        | 0.13                    | 0.98           | -0.03                   | 0.27           | -0.18                   | 1.33           | 0.04                    | 0.30 |
| 3180933        | p_Bacteroidetes; g_Bacteroides; s_ovatus            | 0.0059                | 1.79                                                   | 0.99                                 | 1.19                                        | 0.15                    | 1.31           | -0.12                   | 0.52           | -0.03                   | 0.29           | -0.23                   | 0.95 |
| NR318*         | p_Bacteroidetes; g_Bacteroides; s_uniformis         | 0.0239                | 1.57                                                   | 0.90                                 | 0.90                                        | 0.10                    | 1.06           | 0.10                    | 1.05           | -0.04                   | 0.65           | -0.31                   | 1.50 |
| 190309         | p_Bacteroidetes; g_Bacteroides; s_                  | 0.0062                | 1.36                                                   | 0.99                                 | 0.90                                        | -0.05                   | 0.31           | 0.04                    | 0.45           | 0.14                    | 0.86           | -0.18                   | 0.50 |

|         |                                                       |        |      |       |       |       |      |       |      |       |      |       |      |
|---------|-------------------------------------------------------|--------|------|-------|-------|-------|------|-------|------|-------|------|-------|------|
| 535375  | p_Bacteroidetes; g_Bacteroides; s_ovatus              | 0.9360 | 1.37 | 0.92  | 0.90  | 0.02  | 0.04 | -0.08 | 0.60 | 0.03  | 0.48 | -0.14 | 0.79 |
| 326662  | p_Bacteroidetes; g_Bacteroides; s_                    | 0.0728 | 1.36 | 0.92  | 0.90  | 0.03  | 0.06 | -0.11 | 1.12 | 0.14  | 1.07 | -0.18 | 0.95 |
| 484304  | p_Actinobacteria; g_Bifidobacterium; s_               | 0.0695 | 1.57 | 0.93  | 0.88  | 0.15  | 1.24 | 0.08  | 0.46 | -0.21 | 1.61 | -0.07 | 1.30 |
| 525698  | p_Firmicutes; g_Faecalibacterium; s_prausnitzii       | 0.0338 | 1.35 | 0.92  | 0.88  | 0.04  | 0.23 | -0.02 | 0.18 | 0.14  | 0.96 | -0.17 | 0.50 |
| 514272  | p_Firmicutes; f_Lachnospiraceae; g_; s_               | 0.1467 | 1.48 | 0.94  | 0.82  | -0.08 | 0.45 | -0.04 | 0.47 | 0.24  | 1.43 | -0.16 | 1.03 |
| NR343*  | p_Firmicutes; o_Clostridiales; f_; g_; s_             | 0.0154 | 1.26 | 0.98  | 0.70  | 0.13  | 1.25 | -0.12 | 0.75 | -0.12 | 0.89 | -0.04 | 1.06 |
| 71331   | p_Bacteroidetes; g_Bacteroides; s_ovatus              | 0.0624 | 1.32 | 0.96  | 0.67  | -0.01 | 0.05 | 0.09  | 0.79 | 0.12  | 0.54 | -0.18 | 1.19 |
| 4334711 | p_Bacteroidetes; g_Bacteroides; s_fragilis            | 0.0039 | 1.26 | 0.94  | 0.65  | -0.05 | 0.14 | 0.09  | 0.81 | -0.01 | 0.18 | -0.06 | 0.41 |
| 3887769 | p_Bacteroidetes; g_Bacteroides; s_                    | 0.0037 | 1.26 | -0.97 | -0.36 | 0.24  | 1.78 | 0.28  | 1.36 | -0.30 | 2.11 | -0.31 | 1.60 |
| 586525  | p_Firmicutes; f_Ruminococcaceae; g_; s_               | 0.0114 | 1.29 | -0.90 | -0.70 | -0.03 | 0.30 | -0.33 | 1.81 | 0.01  | 0.29 | 0.26  | 0.97 |
| 319097  | p_Firmicutes; f_Lachnospiraceae; g_; s_               | 0.0818 | 1.40 | -0.99 | -0.84 | -0.22 | 1.44 | -0.41 | 2.50 | 0.33  | 1.88 | 0.24  | 0.98 |
| 361811  | p_Firmicutes; f_Ruminococcaceae; g_; s_               | 0.3521 | 1.29 | -0.92 | -0.84 | 0.02  | 0.21 | -0.35 | 1.86 | 0.08  | 0.23 | 0.10  | 0.51 |
| 564806  | p_Firmicutes; f_Lachnospiraceae; g_; s_               | 0.0272 | 1.48 | -0.95 | -0.88 | 0.06  | 0.63 | 0.26  | 1.45 | -0.24 | 1.96 | -0.04 | 0.78 |
| 571178  | p_Firmicutes; o_Clostridiales; f_; g_; s_             | 0.0110 | 1.32 | -0.98 | -0.88 | 0.00  | 0.01 | 0.07  | 0.50 | 0.06  | 0.27 | -0.11 | 0.67 |
| 351659  | p_Firmicutes; f_Lachnospiraceae; g_; s_               | 0.0987 | 1.41 | -0.96 | -0.90 | -0.12 | 1.19 | 0.20  | 0.81 | 0.18  | 1.05 | -0.04 | 0.59 |
| 364824  | p_Firmicutes; g_Blautia                               | 0.0077 | 1.58 | -0.99 | -0.91 | -0.31 | 2.18 | 0.09  | 0.90 | 0.10  | 0.90 | 0.27  | 1.29 |
| 580008  | p_Firmicutes; f_Erysipelotrichaceae; g_; s_           | 0.2837 | 1.37 | -0.93 | -0.92 | -0.18 | 1.69 | 0.00  | 0.28 | 0.28  | 2.06 | -0.04 | 0.70 |
| 107098  | p_Firmicutes; f_Lachnospiraceae; g_; s_               | 0.0055 | 1.42 | -0.97 | -0.94 | 0.00  | 0.40 | 0.23  | 1.17 | -0.09 | 0.73 | -0.04 | 0.13 |
| 193769  | p_Firmicutes; f_Ruminococcaceae; g_; s_               | 0.0063 | 1.59 | -0.95 | -1.03 | -0.08 | 0.67 | -0.08 | 0.74 | 0.12  | 0.72 | 0.17  | 0.90 |
| 573110  | p_Firmicutes; f_Lachnospiraceae; g_; s_               | 0.0671 | 1.62 | -0.90 | -1.07 | -0.18 | 1.95 | -0.01 | 0.77 | 0.04  | 0.81 | 0.22  | 0.88 |
| 583398  | p_Firmicutes; f_Lachnospiraceae; g_[Ruminococcus]; s_ | 0.5781 | 1.88 | -0.95 | -1.09 | -0.26 | 1.63 | 0.06  | 0.38 | 0.12  | 0.87 | 0.21  | 1.18 |
| 324236  | p_Firmicutes; f_Lachnospiraceae; g_Dorea; s_          | 0.0216 | 1.90 | -0.95 | -1.13 | -0.24 | 2.03 | 0.02  | 0.18 | 0.14  | 1.17 | 0.26  | 1.44 |
| 844006  | p_Firmicutes; f_Ruminococcaceae; g_; s_               | 0.0081 | 1.80 | -0.97 | -1.16 | -0.14 | 0.85 | -0.08 | 0.68 | 0.04  | 0.22 | 0.29  | 1.15 |
| 372348  | p_Firmicutes; f_Ruminococcaceae; g_Ruminococcus; s_   | 0.5814 | 2.07 | -0.94 | -1.27 | -0.07 | 0.88 | -0.24 | 1.43 | 0.11  | 1.02 | 0.21  | 1.07 |
| 523140  | p_Firmicutes; f_Ruminococcaceae; g_Ruminococcus; s_   | 0.0113 | 2.06 | -0.99 | -1.34 | -0.06 | 0.49 | -0.25 | 1.56 | 0.02  | 0.34 | 0.27  | 1.17 |
| 4422039 | p_Firmicutes; f_Lachnospiraceae                       | 0.0220 | 2.08 | -0.96 | -1.39 | -0.22 | 1.95 | -0.06 | 0.47 | 0.11  | 0.88 | 0.34  | 1.63 |

\*NR - New.ReferenceOTU
