# Supplementary material for: Prebiotic effect of inulin-type fructans on faecal microbiota and short-chain fatty acids in type 2 diabetes: a randomised controlled trial
Source: Springer Nature journal article supplement (doi:10.1007/s00394-020-02282-5), 2020-05-21
Supplement: MOESM6 [file 18002980]

## Electronic Supplementary Material

Prebiotic effect of inulin-type fructans on fecal microbiota and short-chain fatty acids in type 2 diabetes: A randomized controlled trial

European Journal of Nutrition

Eline Birkeland<sup>1,2</sup>, Sedegheh Gharagozlian<sup>1</sup>, Kåre I. Birkeland<sup>2,3</sup>, Jørgen Valeur<sup>4,5</sup>, Ingrid Måge<sup>6</sup>, Ida Rud<sup>6</sup>, Anne-Marie Aas<sup>1,2</sup>

Ida Rud and Anne-Marie Aas share last authorship

<sup>1</sup>Section of Nutrition and Dietetics, Department of Clinical Service, Division of Medicine, Oslo University Hospital, Norway, <sup>2</sup>Institute of Clinical Medicine, University of Oslo, Norway <sup>3</sup>Department of Transplantation Medicine, Oslo University Hospital, Norway, <sup>4</sup>Department of Gastroenterology, Oslo University Hospital, Oslo, Norway, <sup>5</sup>Unger-Vetlesen Institute, Lovisenberg Diaconal Hospital, Oslo, Norway, <sup>6</sup>Nofima - Norwegian Institute of Food, Fisheries and Aquaculture Research, Ås, Norway.

Corresponding author: Eline Birkeland, eline.birkeland@ous-hf.no

### Online Resource 6 SCFA baseline concentrations before and after washout<sup>1</sup>

|                          | Baseline concentrations |                     |                |
|--------------------------|-------------------------|---------------------|----------------|
|                          | Before washout          | After washout       | <i>p</i> value |
| Total SCFA (mmol/kg)     | 62.70 (51.91-78.62)     | 62.67 (49.17-82.95) | 0.91           |
| Acetic acid (mmol/kg)    | 36.00 (30.59-43.23)     | 36.71 (26.47-41.15) | 0.39           |
| Propionic acid (mmol/kg) | 11.02 (8.15-15.69)      | 11.06 (6.89-15.99)  | 0.98           |
| Butyric acid (mmol/kg)   | 9.21 (7.29-16.20)       | 11.95 (8.49-15.03)  | 0.44           |

<sup>1</sup>Data are median (25<sup>th</sup>-75<sup>th</sup> percentils). Wilcoxon Signed Rank Test. Significant differences in bold
